# Supplementary material for: Remote and Blended Teacher Education: A Rapid Review
Source: MDPI journal article supplement (doi:10.3390/educsci11080453), 2021-08-23
Supplement: s1 [file s1]

**Supplementary Table – References by Review Database Group**

| <i>Education, Professional Development and Learning Reviews</i>                                                                                                                                                                                                                                                                                                                                                                                                                                                                                                                                                                                                                                                                                                                                                                                                                                                                                                                                                                                                                                                                                                                                                                                                                                                                                                                                                                                                                                                                                                                                                                                                                                                                                                                                                                                                                                                                                                                                                                                                                                                                                                                                                                                                                                                                                                                                                                                                                                                                                                                                                                                                                                                                                                                                                                                                                                                                                                                                                                                                                                                                                                                                                                                                                                     |  |
|-----------------------------------------------------------------------------------------------------------------------------------------------------------------------------------------------------------------------------------------------------------------------------------------------------------------------------------------------------------------------------------------------------------------------------------------------------------------------------------------------------------------------------------------------------------------------------------------------------------------------------------------------------------------------------------------------------------------------------------------------------------------------------------------------------------------------------------------------------------------------------------------------------------------------------------------------------------------------------------------------------------------------------------------------------------------------------------------------------------------------------------------------------------------------------------------------------------------------------------------------------------------------------------------------------------------------------------------------------------------------------------------------------------------------------------------------------------------------------------------------------------------------------------------------------------------------------------------------------------------------------------------------------------------------------------------------------------------------------------------------------------------------------------------------------------------------------------------------------------------------------------------------------------------------------------------------------------------------------------------------------------------------------------------------------------------------------------------------------------------------------------------------------------------------------------------------------------------------------------------------------------------------------------------------------------------------------------------------------------------------------------------------------------------------------------------------------------------------------------------------------------------------------------------------------------------------------------------------------------------------------------------------------------------------------------------------------------------------------------------------------------------------------------------------------------------------------------------------------------------------------------------------------------------------------------------------------------------------------------------------------------------------------------------------------------------------------------------------------------------------------------------------------------------------------------------------------------------------------------------------------------------------------------------------------|--|
| <p>Carter, A. Carter Review of Initial Teacher Training (ITT). 2015. Available online: <a href="https://assets.publishing.service.gov.uk/government/uploads/system/uploads/attachment_data/file/399957/Carter_Review.pdf">https://assets.publishing.service.gov.uk/government/uploads/system/uploads/attachment_data/file/399957/Carter_Review.pdf</a> (accessed on 26th August 2020).</p> <p>Cordingley, P.; Greany, T.; Crisp, B.; Seleznyov, S.; Bradbury, M.; Perry, T. <i>Developing Great Subject Teaching: Rapid Evidence Review of Subject-Specific Continuing Professional Development in the UK</i>; CUREE Limited: London, UK, 2018.</p> <p>Cordingley, P.; Higgins, S.; Greany, T.; Buckler, N.; Coles-Jordan, D.; Crisp, B.; Coe, R. <i>Developing Great Teaching: Lessons from the International Reviews into Effective Professional Development</i>; Durham University: Durham, UK, 2015.</p> <p>Cordingley, P.; Higgins, S.; Greany, T.; Crisp, B.; Araviaki, E.; Coe, R.; Johns, P. Developing Great Leadership of CPDL. Available online: <a href="http://www.curee.co.uk/node/5214">http://www.curee.co.uk/node/5214</a> (accessed on 26th August 2020).</p> <p>Le Cornu, R. <i>Key Components of Effective Professional Experience in Initial Teacher Education in Australia</i>; Australian Institute for Teaching and School Leadership: Melbourne, VIC, Australia, 2015. Available online: <a href="https://www.aitsl.edu.au/docs/default-source/default-document-library/aitsl_key-components-of-effective-professional-experience.pdf?sfvrsn=aec9ec3c_0">https://www.aitsl.edu.au/docs/default-source/default-document-library/aitsl_key-components-of-effective-professional-experience.pdf?sfvrsn=aec9ec3c_0</a> (accessed on 26th August 2020).</p> <p>Darling-Hammond, L.; Hyler, M.E.; Gardner, M. <i>Effective teacher professional development</i>. Learning Policy Institute: Palo Alto, CA, 2017.</p> <p>Deans for Impact. <i>Practice with Purpose: The Emerging Science of Teacher Expertise</i>; Deans for Impact: Austin, TX, USA, 2016.</p> <p>Fletcher-Wood, H.; Zuccollo, J. <i>The Effects of High-Quality Professional Development on Teachers and Students: A Rapid Review and Meta-Analysis</i>; Wellcome Trust; Education Policy Institute: London, UK, 2020.</p> <p>Hill, H.C.; Lynch, K.; Gonzalez, K.E.; Pollard, C. Professional development that improves STEM outcomes. <i>Phi Delta Kappan</i> <b>2020</b>, <i>101</i>, 50–56.</p> <p>Lauer, P.A.; Christopher, D.E.; Firpo-Triplett, R.; Buchting, F. The impact of short-term professional development on participant outcomes: A review of the literature. <i>Prof. Dev. Educ.</i> <b>2014</b>, <i>40</i>, 207–227.</p> <p>OECD. <i>A Flying Start: Improving Initial Teacher Preparation Systems</i>; OECD Publishing: Paris, France, 2019; doi:10.1787/cf74e549-en.</p> <p>Rogers, S.; Brown, C.; Poblete, X. A systematic review of the evidence base for professional learning in early years education (The PLEYE Review). <i>Rev. Educ.</i> <b>2020</b>, <i>8</i>, 156–188.</p> <p>Timperley, H.; Wilson, A.; Barrar, H.; Fung, I. <i>Teacher Professional Learning and Development: Best Evidence Synthesis Iteration</i>; Ministry of Education: Wellington, New Zealand, 2007.</p> |  |
| <i>Remote or Blended Professional Development and Learning Reviews</i>                                                                                                                                                                                                                                                                                                                                                                                                                                                                                                                                                                                                                                                                                                                                                                                                                                                                                                                                                                                                                                                                                                                                                                                                                                                                                                                                                                                                                                                                                                                                                                                                                                                                                                                                                                                                                                                                                                                                                                                                                                                                                                                                                                                                                                                                                                                                                                                                                                                                                                                                                                                                                                                                                                                                                                                                                                                                                                                                                                                                                                                                                                                                                                                                                              |  |
| <p>Burns, M. <i>Distance Education for Teacher Training: Modes, Models and Methods</i>; Education Development Center Inc.: Washington, DC, USA, 2011.</p> <p>Dyment, J.E.; Downing, J.J. Online initial teacher education: A systematic review of the literature. <i>Asia Pac. J. Teach. Educ.</i> <b>2020</b>, <i>48</i>, 316–333.</p> <p>Keengwe, J.; Kang, J.J. A review of empirical research on blended learning in teacher education programs. <i>Educ. Inf. Technol.</i> <b>2013</b>, <i>18</i>, 479–493.</p> <p>Lantz-Andersson, A.; Lundin, M.; Selwyn, N. Twenty years of online teacher communities: A systematic review of formally-organized and informally-developed professional learning groups. <i>Teach. Teach. Educ.</i> <b>2018</b>, <i>75</i>, 302–315.</p> <p>Macià, M.; García, I. Informal online communities and networks as a source of teacher professional development: A review. <i>Teach. Teach. Educ.</i> <b>2016</b>, <i>55</i>, 291–307.</p> <p>Owston, R.; Wideman, H.; Murphy, J.; Lupshenyuk, D. Blended teacher professional development: A synthesis of three program evaluations. <i>Internet High. Educ.</i> <b>2008</b>, <i>11</i>, 201–210.</p> <p>Saifuddin, K.M.; Strange, M.H. School teacher professional development in online communities of practice: A systematic literature review. In <i>Proceedings of the 15th European Conference on e-Learning, Prague, Czech Republic, 27–28 October 2016</i>; Academic Conferences International Limited: Reading, UK, 2016; pp. 605–614.</p> <p>Snell, E.K.; Hindman, A.H.; Wasik, B.A. A review of research on technology-mediated language and literacy professional development models. <i>J. Early Child. Teach. Educ.</i> <b>2019</b>, <i>40</i>, 205–220.</p> <p>Surrette, T.N.; Johnson, C.C. Assessing the ability of an online environment to facilitate the critical features of teacher professional development. <i>Sch. Sci. Math.</i> <b>2015</b>, <i>115</i>, 260–270.</p>                                                                                                                                                                                                                                                                                                                                                                                                                                                                                                                                                                                                                                                                                                                                                                                                                                                                                                                                                                                                                                                                                                                                                                                                                                                                                                                |  |
| <i>Empirical Studies</i>                                                                                                                                                                                                                                                                                                                                                                                                                                                                                                                                                                                                                                                                                                                                                                                                                                                                                                                                                                                                                                                                                                                                                                                                                                                                                                                                                                                                                                                                                                                                                                                                                                                                                                                                                                                                                                                                                                                                                                                                                                                                                                                                                                                                                                                                                                                                                                                                                                                                                                                                                                                                                                                                                                                                                                                                                                                                                                                                                                                                                                                                                                                                                                                                                                                                            |  |
| <p>Allen, J.P.; Hafen, C.A.; Gregory, A.C.; Mikami, A.Y.; Pianta, R. Enhancing secondary school instruction and student achievement: Replication and extension of the My Teaching Partner-Secondary intervention. <i>J. Res. Educ. Eff.</i> <b>2015</b>, <i>8</i>, 475–489.</p> <p>Ascetta, K.; Harn, B.; Durán, L. Comparing Self-Reported and Performance-Based Online Feedback on Early Childhood Teachers' Implementation of Language Strategies. <i>Early Child. Educ. J.</i> <b>2019</b>, <i>47</i>, 353–365.</p>                                                                                                                                                                                                                                                                                                                                                                                                                                                                                                                                                                                                                                                                                                                                                                                                                                                                                                                                                                                                                                                                                                                                                                                                                                                                                                                                                                                                                                                                                                                                                                                                                                                                                                                                                                                                                                                                                                                                                                                                                                                                                                                                                                                                                                                                                                                                                                                                                                                                                                                                                                                                                                                                                                                                                                             |  |

- Dash, S.; Magidin de Kramer, R.; O'Dwyer, L.M.; Masters, J.; Russell, M. Impact of online professional development on teacher quality and student achievement in fifth grade mathematics. *J. Res. Technol. Educ.* **2012**, *45*, 1–26.
- Fisher, J.B.; Schumaker, J.B.; Culbertson, J.; Deshler, D.D. Effects of a computerized professional development program on teacher and student outcomes. *J. Teach. Educ.* **2010**, *61*, 302–312.
- Fishman, B.; Konstantopoulos, S.; Kubitskey, B.W.; Vath, R.; Park, G.; Johnson, H.; Edelson, D.C. Comparing the impact of online and face-to-face professional development in the context of curriculum implementation. *J. Teach. Educ.* **2013**, *64*, 426–438.
- Fishman, B.; Fischer, C.; Kook, J.F.; Levy, A.; Jia, Y.; Eisenkraft, A.; McCoy, A. Professional development for the redesigned AP biology exam: Teacher participation patterns and student outcomes [Paper Presentation]. In *2014 Annual Meeting of the American Educational Research Association*, Philadelphia, PA, USA. **2014**.
- Frumin, K.; Dede, C.; Fischer, C.; Foster, B.; Lawrenz, F.; Eisenkraft, A.; McCoy, A. Adapting to large-scale changes in Advanced Placement Biology, Chemistry, and Physics: The impact of online teacher communities. *Int. J. Sci. Educ.* **2018**, *40*, 397–420.
- Goldenberg, L.; Culp, K.; Clements, M.; Anderson, A.; Pasquale, M. Online professional development for high-school biology teachers: Effects on teachers' and students' knowledge. *J. Technol. Teach. Educ.* **2014**, *22*, 287–309.
- Griffin, C.C.; Dana, N.F.; Pape, S.J.; Algina, J.; Bae, J.; Prosser, S.K.; League, M.B. Prime online: Exploring teacher professional development for creating inclusive elementary mathematics classrooms. *Teach. Educ. Spec. Educ.* **2018**, *41*, 121–139.
- Hoffman, J.A.; Schmidt, E.M.; Arguello, D.J.; Eyllon, M.N.; Castaneda-Sceppa, C.; Cloutier, G.; Hillman, C.H. Online preschool teacher training to promote physical activity in young children: A pilot cluster randomized controlled trial. *Sch. Psychol.* **2020**, *35*, 118.
- Kraft, M.A.; Hill, H.C. Developing Ambitious Mathematics Instruction Through Web-Based Coaching: A Randomized Field Trial. *Am. Educ. Res. J.* **2018**, *57*, 2378–2414.
- Marquez, B.; VinCent, C.; Marquez, J.; Pennefather, J.; Smolkowski, K.; Sprague, J. Opportunities and challenges in training elementary school teachers in classroom management: Initial results from classroom management in action, an online professional development program. *J. Technol. Teach. Educ.* **2016**, *24*, 87–109.
- Rock, H.M. The Effect of Face-to-Face Versus Online Pedagogy-Based Professional Development on Student Learning Outcomes. Ph.D. Thesis, Grand Canyon University, Phoenix, AZ, USA, July, 2017.
- Rosenberg, N.E.; Artman-Meeker, K.; Kelly, E.; Yang, X. The Effects of a Bug-in-Ear Coaching Package on Implementation of Incidental Teaching by Paraprofessionals in a K-12 School. *J. Behav. Educ.* **2020**, *29*, 1–24.
- Russell, M.; Carey, R.; Kleiman, G.; Venable, J.D. Face-to-face and online professional development for mathematics teachers: A comparative study. *J. Asynchronous Learn. Netw.* **2009**, *13*, 71–87.
- Shaha, S.; Ellsworth, H. Multi-state, quasi-experimental study of the impact of internet-based, on-demand professional learning on student performance. *Int. J. Eval. Res. Educ.* **2013**, *2*, 175–184.
- Shaha, S.H.; Glassett, K.F.; Copas, A. The impact of teacher observations with coordinated professional development on student performance: A 27-state program evaluation. *J. Coll. Teach. Learn.* **2015**, *12*, 55–64.
- Shaha, S.H.; Glassett, K.; Copas, A. Sustaining Student Gains from Online On-Demand Professional Development. *J. Int. Educ. Res.* **2015**, *11*, 163–172.
- Shaha, S.; Glassett, K.; Copas, A.; Ellsworth, H. Title I Schools: The Student-Based Impact of Online, On-Demand Professional Development on Educators. *Contemp. Issues Educ. Res.* **2015**, *8*, 227–234.
- Shaha, S.; Glassett, K.; Copas, A.; Huddleston, T.L. Maximizing educator enhancement: Aligned seminar and online professional development. *Contemp. Issues Educ. Res.* **2016**, *9*, 15–22.
- Shaha, S.H.; Glassett, K.F.; Ellsworth, H. Long-term impact of on-demand professional development on student performance: A longitudinal multi-state study. *J. Int. Educ. Res.* **2015**, *11*, 29–34.
- Walker, A.; Recker, M.; Ye, L.; Robertshaw, M.B.; Sellers, L.; Leary, H. Comparing technology-related teacher professional development designs: A multilevel study of teacher and student impacts. *Educ. Technol. Res. Dev.* **2012**, *60*, 421–444.
- Webb, D.C.; Nickerson, H.; Bush, J.B. A comparative analysis of online and face-to-face professional development models for CS education. In *Proceedings of the 2017 ACM SIGCSE Technical Symposium on Computer Science Education*; Association for Computing Machinery: New York, NY, USA, 2017; pp. 621–626.
- Weschke, B.; Barclay, R.D.; Vandersall, K. Online Teacher Education: Exploring the Impact of a Reading and Literacy Program on Student Learning. *J. Asynchronous Learn. Netw.* **2011**, *15*, 22–43.

### Background Pieces

- Annetta, L.; Shymansky, J.A. A comparison of rural elementary school teacher attitudes toward three modes of distance education for science professional development. *J. Sci. Teach. Educ.* **2008**, *19*, 255–267.
- Carpenter, J.P.; Krutka, D.G. Engagement through microblogging: Educator professional development via Twitter. *Prof. Dev. Educ.* **2015**, *41*, 707–728.
- De Carvalho Borba, M.; Llinares, S. Online mathematics teacher education: Overview of an emergent field of research. *ZDM* **2012**, *44*, 697–704.
- Dana, N.F.; Pape, S.J.; Griffin, C.C.; Prosser, S.K. Incorporating practitioner inquiry into an online professional development program: The Prime Online experience. *Prof. Dev. Educ.* **2017**, *43*, 212–231.

- Dede, C.; Eisenkraft, A.; Frumin, K.; Hartley, A. *Teacher Learning in the Digital Age: Online Professional Development in STEM Education*; Harvard Education Press: Cambridge, MA, USA, 2016.
- Dede, C.; Jass Ketelhut, D.; Whitehouse, P.; Breit, L.; McCloskey, E.M. A research agenda for online teacher professional development. *J. Teach. Educ.* **2009**, *60*, 8–19.
- Downer, J.T.; Locasale-Crouch, J.; Hamre, B.; Pianta, R. Teacher characteristics associated with responsiveness and exposure to consultation and online professional development resources. *Early Educ. Dev.* **2009**, *20*, 431–455.
- Elliott, J.C. The evolution from traditional to online professional development: A review. *J. Digit. Learn. Teach. Educ.* **2017**, *33*, 114–125.
- Fischer, C.; Fishman, B.; Schoenebeck, S.Y. New contexts for professional learning: Analyzing high school science teachers' engagement on Twitter. *AERA Open* **2019**, *5*, 2332858419894252.
- Fishman, B.; Konstantopoulos, S.; Kubitskey, B.W.; Vath, R.; Park, G.; Johnson, H.; Edelson, D. The future of professional development will be designed, not discovered: Response to Moon, Passmore, Reiser, and Michaels, "Beyond comparisons of online versus face-to-face PD". *J. Teach. Educ.* **2014**, *65*, 261–264.
- Holmes, B. School Teachers' Continuous Professional Development in an Online Learning Community: Lessons from a case study of an e T winning Learning Event. *Eur. J. Educ.* **2013**, *48*, 97–112.
- Jamil, F.M.; Hamre, B.K. Teacher reflection in the context of an online professional development course: Applying principles of cognitive science to promote teacher learning. *Action Teach. Educ.* **2018**, *40*, 220–236.
- Matzat, U. Do blended virtual learning communities enhance teachers' professional development more than purely virtual ones? A large scale empirical comparison. *Comput. Educ.* **2013**, *60*, 40–51.
- Moon, J.; Passmore, C.; Reiser, B.J.; Michaels, S. Beyond comparisons of online versus face-to-face PD: Commentary in response to Fishman et al., "Comparing the impact of online and face-to-face professional development in the context of curriculum implementation". *J. Teach. Educ.* **2014**, *65*, 172–176.
- Parsons, S.A.; Hutchison, A.C.; Hall, L.A.; Parsons, A.W.; Ives, S.T.; Leggett, A.B. US teachers' perceptions of online professional development. *Teach. Teach. Educ. Int. J. Res. Stud.* **2019**, *82*, 33–42.
- Qian, Y.; Hambrusch, S.; Yadav, A.; Gretter, S. Who needs what: Recommendations for designing effective online professional development for computer science teachers. *J. Res. Technol. Educ.* **2018**, *50*, 164–181.
- Quinn, F.; Charteris, J.; Adlington, R.; Rizk, N.; Fletcher, P.; Reyes, V.; Parkes, M. Developing, situating and evaluating effective online professional learning and development: A review of some theoretical and policy frameworks. *Aust. Educ. Res.* **2019**, *46*, 405–424.
- Reeves, T.D.; Pedulla, J.J. Predictors of teacher satisfaction with online professional development: Evidence from the USA's e-Learning for Educators initiative. *Prof. Dev. Educ.* **2011**, *37*, 591–611.
- Seddon, K.; Postlethwaite, K.; James, M.; Mulryne, K. Towards an understanding of the learning processes that occur in synchronous online seminars for the professional development of experienced educators. *Educ. Inf. Technol.* **2012**, *17*, 431–449.
